# Supplementary material
Source: Royal Society of Chemistry journal article supplement (doi:10.1039/d6gc00716c)
Supplement: d6gc00716c1.pdf [file d6gc00716c1.pdf]

## Supporting Information

### **One-pot oxidation-acetalization strategy for photocatalytic cleavage of C-C bonds in lignin model compounds over phosphorus-doped carbon nitride**

*Yuguo Dong<sup>a,b,†</sup>, Puyan Bai<sup>b,†</sup>, Hongyu Yang<sup>b,†</sup>, Changle Zhao<sup>b,†</sup>, Lin Dong<sup>a,b,\*</sup>, Xiaoli Gu<sup>a,b,\*</sup>, and Zupeng Chen<sup>a,b,\*</sup>*

*<sup>a</sup>State Key Laboratory for Development and Utilization of Forest Food Resources, Nanjing Forestry University, Nanjing 210037, China*

*<sup>b</sup>Jiangsu Co-Innovation Center of Efficient Processing and Utilization of Forest Resources, International Innovation Center for Forest Chemicals and Materials, Nanjing Forestry University, Nanjing 210037, China*

*† These authors contributed equally to this work.*

*\* Corresponding authors.*

Email address: [donglin@njfu.edu.cn](mailto:donglin@njfu.edu.cn)

Email address: [guxiaoli@njfu.edu.cn](mailto:guxiaoli@njfu.edu.cn)

Email address: [czp@njfu.edu.cn](mailto:czp@njfu.edu.cn)

## Supplementary Tables

**Table S1.** The physicochemical properties of different catalysts.

| Sample               | $S_{\text{BET}}^{\text{a}}$<br>( $\text{m}^2 \cdot \text{g}^{-1}$ ) | $V_{\text{p}}^{\text{b}}$<br>( $\text{cm}^3 \cdot \text{g}^{-1}$ ) | PD <sup>c</sup><br>(nm) | C content <sup>d</sup><br>(at.%) | N content <sup>d</sup><br>(at.%) | P content <sup>d</sup><br>(at.%) | P content <sup>e</sup><br>(wt.%) |
|----------------------|---------------------------------------------------------------------|--------------------------------------------------------------------|-------------------------|----------------------------------|----------------------------------|----------------------------------|----------------------------------|
| GCN                  | 6.07                                                                | 0.05                                                               | 27.6                    | 44.3                             | 55.7                             | /                                | /                                |
| P <sub>1,2</sub> -CN | 19.54                                                               | 0.12                                                               | 25.7                    | 43.7                             | 54.8                             | 1.5                              | 11.6                             |

<sup>a</sup>BET surface area. <sup>b</sup>Pore volume. <sup>c</sup>Average pore diameter. <sup>d</sup>Determined by XPS analysis.

<sup>e</sup>Determined by ICP-OES.

**Table S2.** Elemental composition and chemical states of catalysts according to the XPS analysis.

| Sample               | N=C-N <sup>a</sup><br>(%) | C-NH <sub>2</sub> <sup>a</sup><br>(%) | C-C <sup>a</sup><br>(%) | C=N-C <sup>b</sup><br>(%) | C-N-H <sup>b</sup><br>(%) | N-(C) <sub>3</sub> <sup>b</sup><br>(%) | $\pi$ -excitation <sup>b</sup><br>(%) |
|----------------------|---------------------------|---------------------------------------|-------------------------|---------------------------|---------------------------|----------------------------------------|---------------------------------------|
| GCN                  | 83.5                      | 4.9                                   | 11.7                    | 67.7                      | 23.5                      | 2.9                                    | 5.9                                   |
| P <sub>1,2</sub> -CN | 76.0                      | 9.8                                   | 14.2                    | 68.2                      | 18.5                      | 10.4                                   | 2.9                                   |

<sup>a</sup>C 1s states. <sup>b</sup>N 1s states.

**Table S3.** Catalytic performances of other conventional photocatalysts for the cleavage of C-C bonds in 2-phenoxy-1-phenylethanol (pp-ol). Reaction conditions: 10 mg of photocatalyst, 10 mg of pp-ol, 3 mL of MeOH, 425 nm LED, O<sub>2</sub>, 9 h.

| Entry | Catalyst                       | Conversion<br>(%) | Yield of pp-one<br>(%) | Yield of P1<br>(%) | Yield of P2<br>(%) |
|-------|--------------------------------|-------------------|------------------------|--------------------|--------------------|
| 1     | V <sub>2</sub> O <sub>5</sub>  | <1                | <1                     | <1                 | <1                 |
| 2     | In <sub>2</sub> O <sub>3</sub> | <1                | <1                     | 0                  | 0                  |
| 3     | Bi <sub>2</sub> O <sub>3</sub> | <1                | <1                     | 0                  | 0                  |
| 4     | CdS                            | <1                | <1                     | 0                  | 0                  |
| 5     | CuO                            | 0                 | 0                      | 0                  | 0                  |

**Table S4.** Comparison of performances of PCN catalyst with photo-, thermo-, and electro-catalytic systems for the C-C bond cleavage in pp-ol.

| Entry            | Catalyst                                                         | Conversion (%) | Yield of the main products (%)                                                         |                                                                                          | References       |
|------------------|------------------------------------------------------------------|----------------|----------------------------------------------------------------------------------------|------------------------------------------------------------------------------------------|------------------|
| Photocatalysis   |                                                                  |                |                                                                                        |                                                                                          |                  |
| 1                | PCN                                                              | >99.9          | 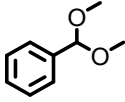 91   |  56   | <b>This work</b> |
| 2                | porous C <sub>3</sub> N <sub>4</sub>                             | 99             |  65   |  31   | 1                |
| 3                | mesoporous C <sub>3</sub> N <sub>4</sub>                         | 96             |  51   |  30   | 2                |
| 4                | PC-Mes <sup>a</sup>                                              | 83             |  69   |  58   | 3                |
| 5                | Mo <sub>132</sub> , K <sub>2</sub> S <sub>2</sub> O <sub>8</sub> | 92             |  73  |  5   | 4                |
| Thermocatalysis  |                                                                  |                |                                                                                        |                                                                                          |                  |
| 6                | Pd/CeO <sub>2</sub>                                              | 70             |  27 |  38 | 5                |
| 7                | Au-Pd-CTFs                                                       | 96             |  17 |  49 | 6                |
| Electrocatalysis |                                                                  |                |                                                                                        |                                                                                          |                  |
| 8                | TCP-Pd/CNTs                                                      | 99             |  32 |  18 | 7                |
| 9                | Mo@NiCoOOH                                                       | 93             |  57 |  13 | 8                |

<sup>a</sup>PC-MES = Mes-10-phenyl-Acr<sup>+</sup>-BF<sub>4</sub><sup>-</sup>

## Supplementary Figures

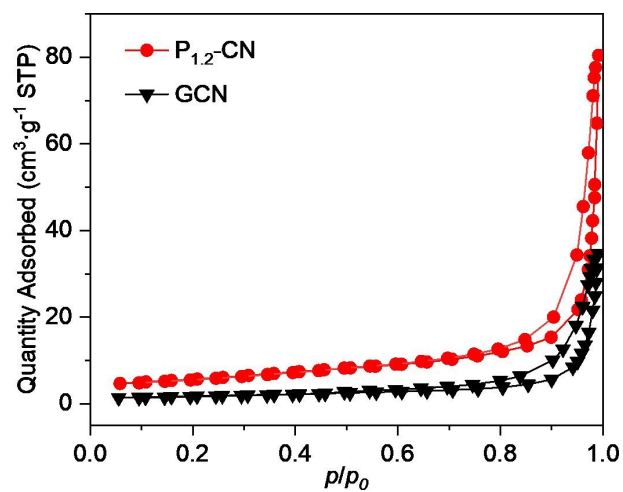

**Figure S1.** N<sub>2</sub> adsorption-desorption isotherms of the GCN and P<sub>1.2</sub>-CN catalysts.

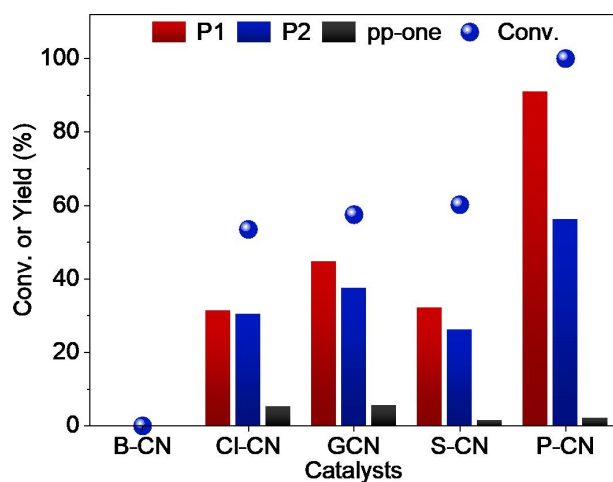

**Figure S2.** Screening of different dopants for photocatalytic depolymerization of pp-ol. Reaction conditions: 10 mg of pp-ol, 10 mg of catalyst, 3 mL of methanol, O<sub>2</sub>, 8 W blue 420 nm LED light, 9 h.

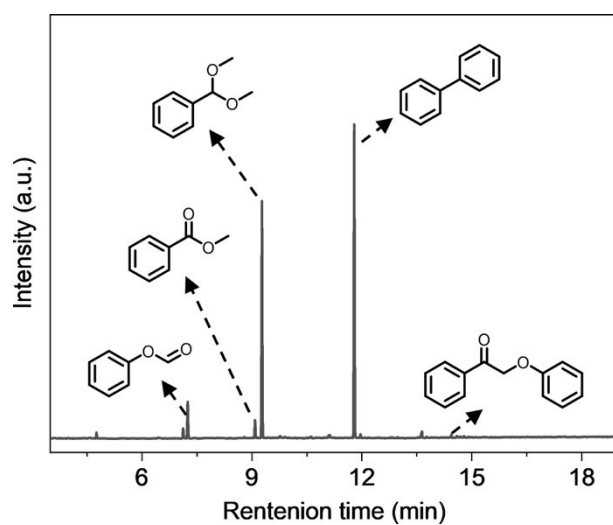

**Figure S3.** GC-MS spectrum of 2-phenoxy-1-phenylethanol (pp-ol) conversion catalyzed by P<sub>1,2</sub>-CN for 9 h.

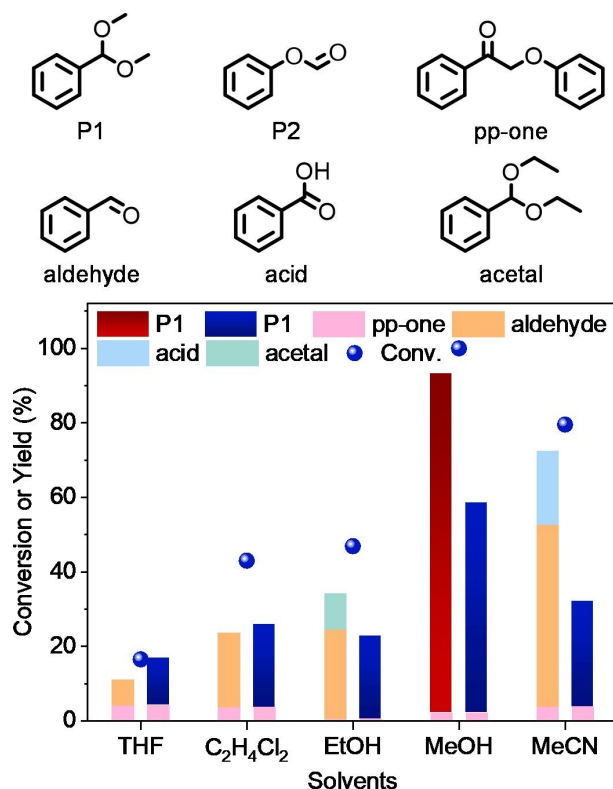

**Figure S4.** Screening of reaction solvents for photocatalytic depolymerization of pp-ol. Reaction conditions: 10 mg of pp-ol, 10 mg of catalyst, 3 mL of solvent, O<sub>2</sub>, 8 W blue 420 nm LED light, 9 h.

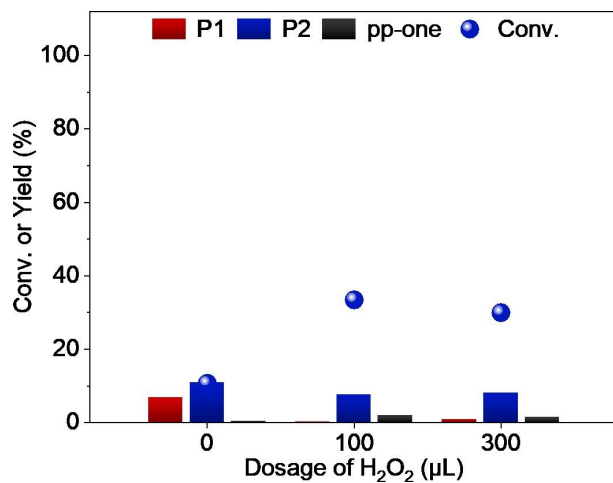

**Figure S5.** Screening of using H<sub>2</sub>O<sub>2</sub> as oxidant for photocatalytic depolymerization of pp-ol. Reaction conditions: 10 mg of pp-ol, 10 mg of catalyst, 3 mL of methanol, N<sub>2</sub>, H<sub>2</sub>O<sub>2</sub>, 8 W blue 420 nm LED light, 9 h.

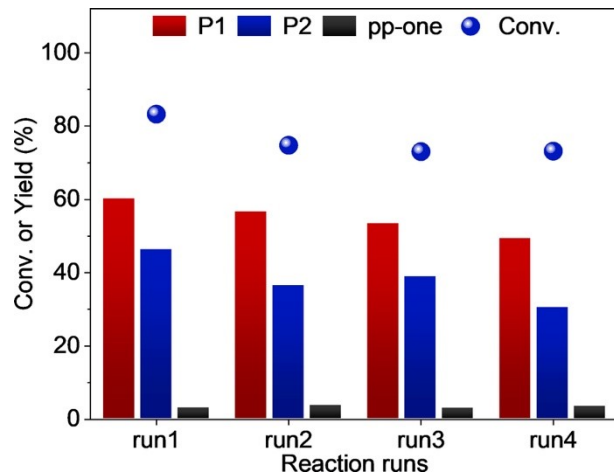

**Figure S6.** The stability tests of the P<sub>1,2</sub>-CN catalyst.

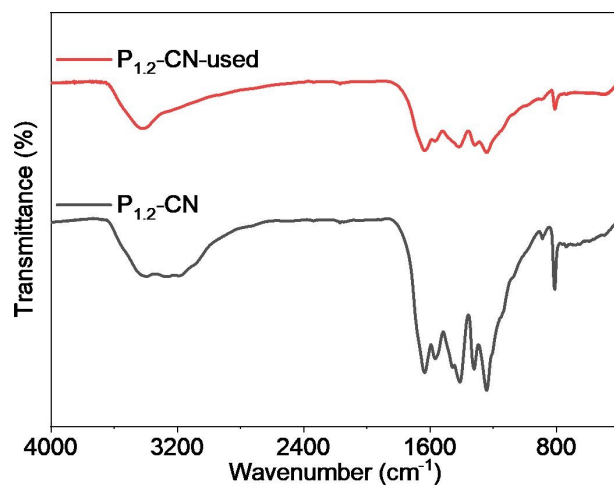

**Figure S7.** FT-IR spectra of fresh and used P<sub>1,2</sub>-CN catalysts.

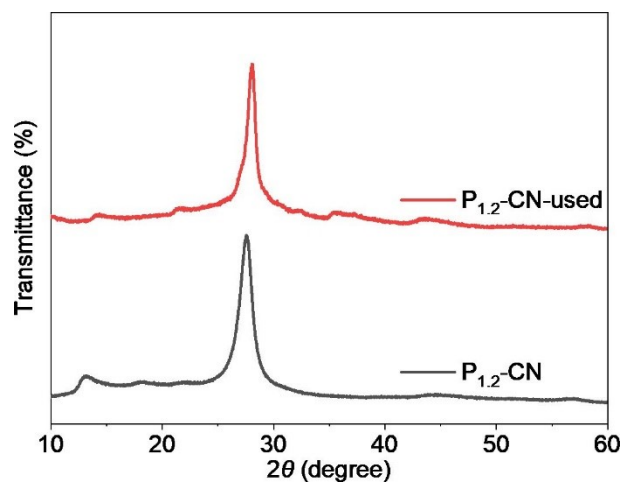

**Figure S8.** XRD patterns of fresh and used P<sub>1,2</sub>-CN catalysts.

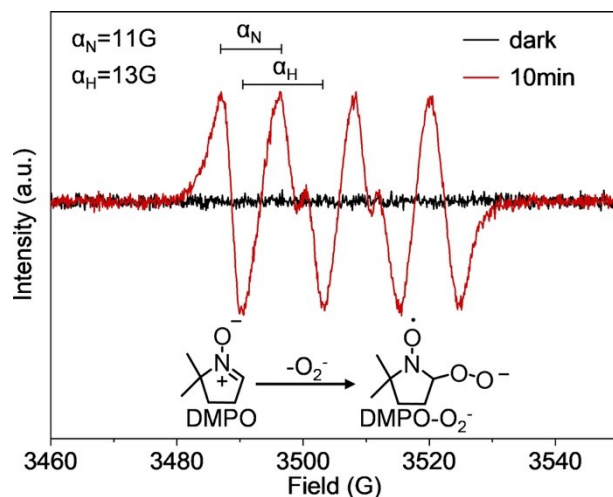

**Figure S9.** ESR spectra over P<sub>1,2</sub>-CN in acetonitrile dispersion.

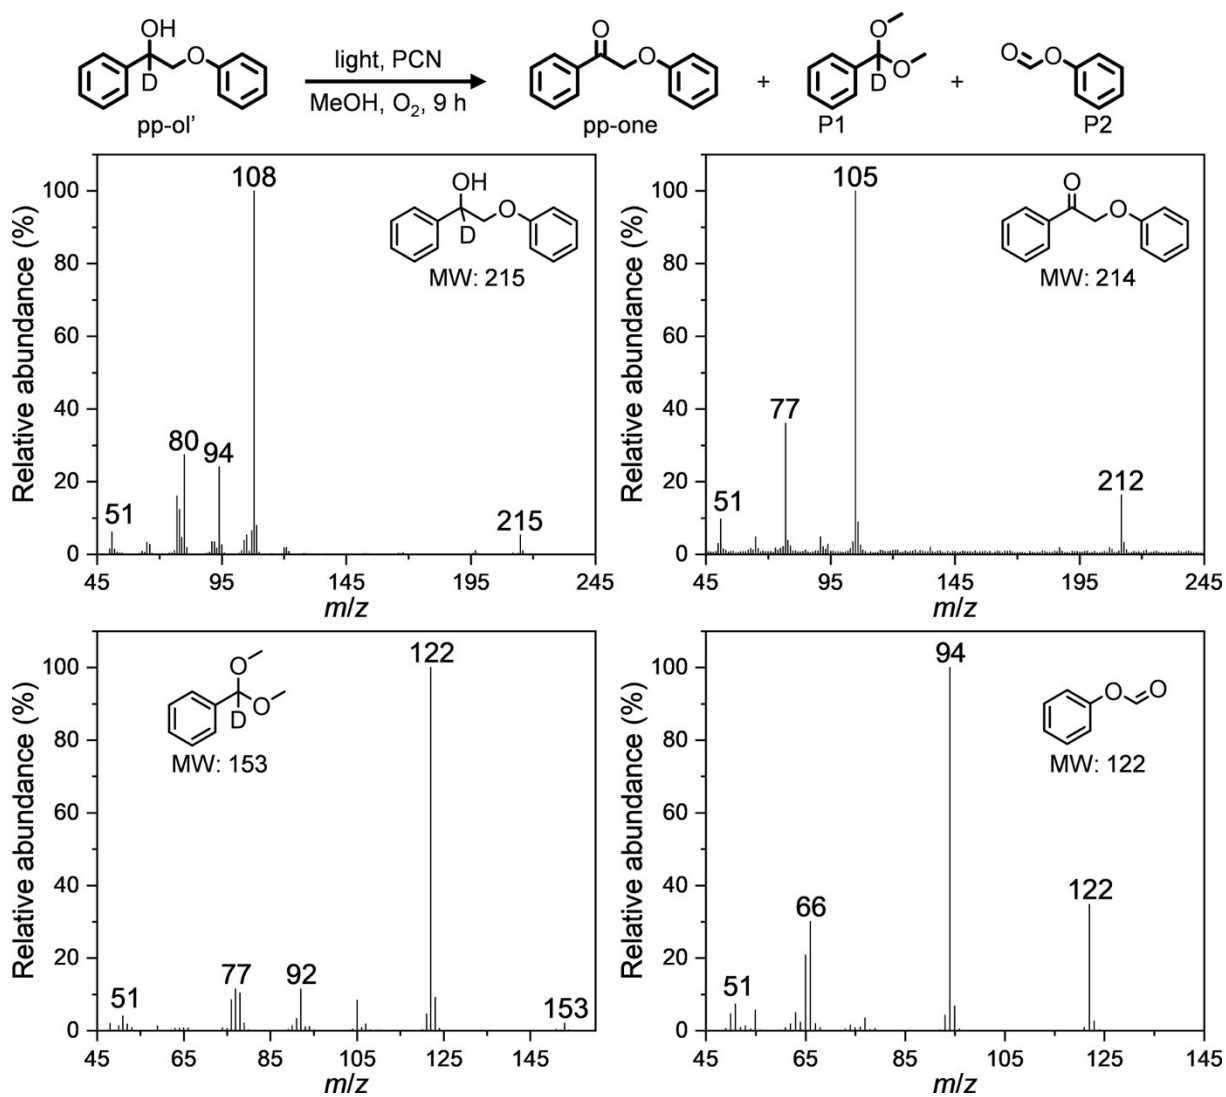

**Figure S10.** Mass spectra of the reaction system of pp-ol'.

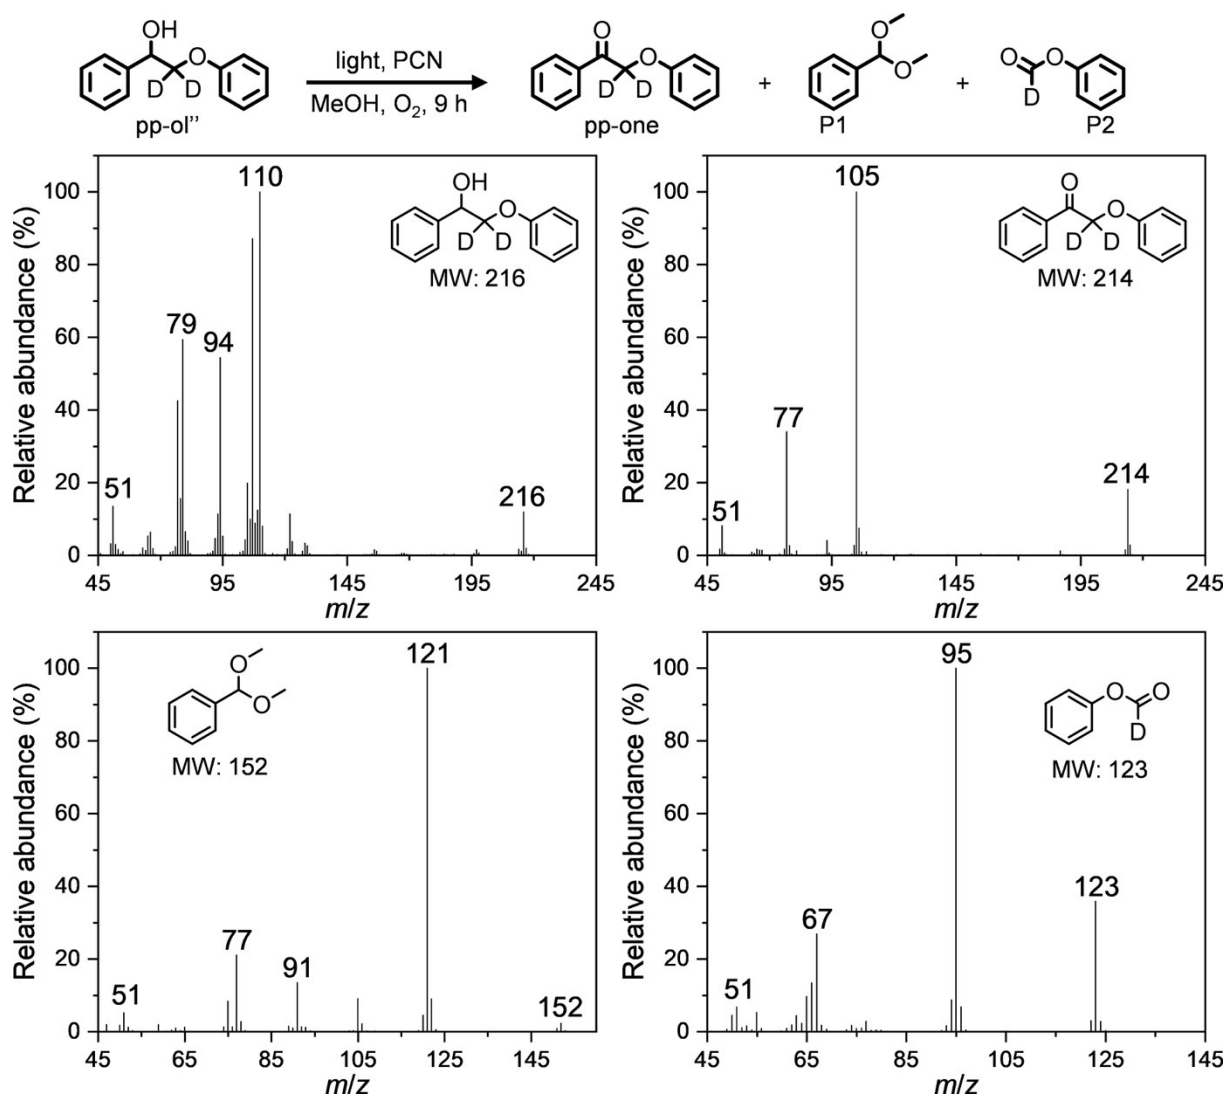

**Figure S11.** Mass spectra of the reaction system of pp-ol''.

## References

1. D. Liang, J. Wu, C. Xie, J. Wen, Y. Lyu, Z. Sofer, J. Zheng and S. Wang, *Appl. Catal. B-Environ.*, 2022, **317**, 121690.
2. H. Liu, H. Li, J. Lu, S. Zeng, M. Wang, N. Luo, S. Xu and F. Wang, *ACS Catal.*, 2018, **8**, 4761-4771.
3. Y. Liu, H. Liu, N. Li and F. Wang, *Appl. Catal. B-Environ.*, 2023, **339**, 123137.
4. H.-J. Lee and E. S. Cho, *ACS Sustain. Chem. Eng.*, 2023, **11**, 7624-7632.
5. W. P. Deng, H. X. Zhang, X. J. Wu, R. S. Li, Q. H. Zhang and Y. Wang, *Green Chem.*, 2015, **17**, 5009-5018.
6. L. Zhao, S. Shi, G. Zhu, M. Liu, J. Gao and J. Xu, *Green Chem.*, 2019, **21**, 6707-6716.
7. P. Ren, L. Shi, Z. Kan, J. Bai, Y. Liu, S. Yang, S. Li and S. Liu, *Catal. Sci. Technol.*, 2024, **14**, 973-979.
8. J. Xu, J. Meng, Y. Hu, Y. Liu, Y. Lou, W. Bai, S. Dou, H. Yu and S. Wang, *Research*, 2023, **6**, 0288.
